# Supplementary material for: Improved H2S gas sensing properties of ZnO nanorods via decoration of nano-porous SiO2 thin layers
Source: Royal Society of Chemistry journal article supplement (doi:10.1039/c6ra05611c), 2016-01-01
Supplement: c6ra05611c1.pdf [file c6ra05611c1.pdf]

## Electronic Supplementary Information (ESI)

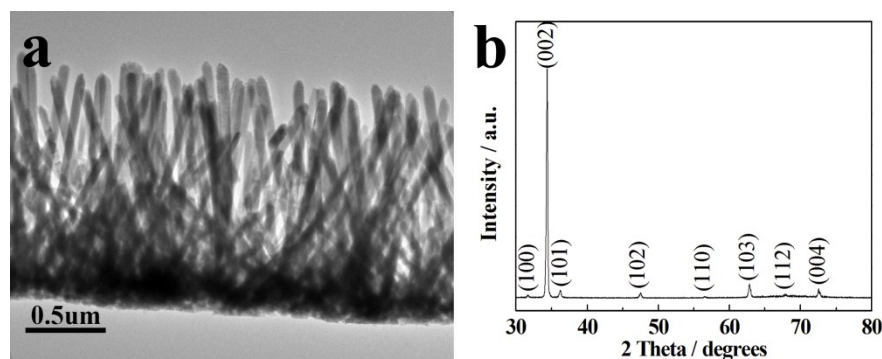

**Figure S1.** (a) Cross-section TEM image of oriented ZnO nanorods; (b) XRD pattern of the oriented ZnO nanorods.

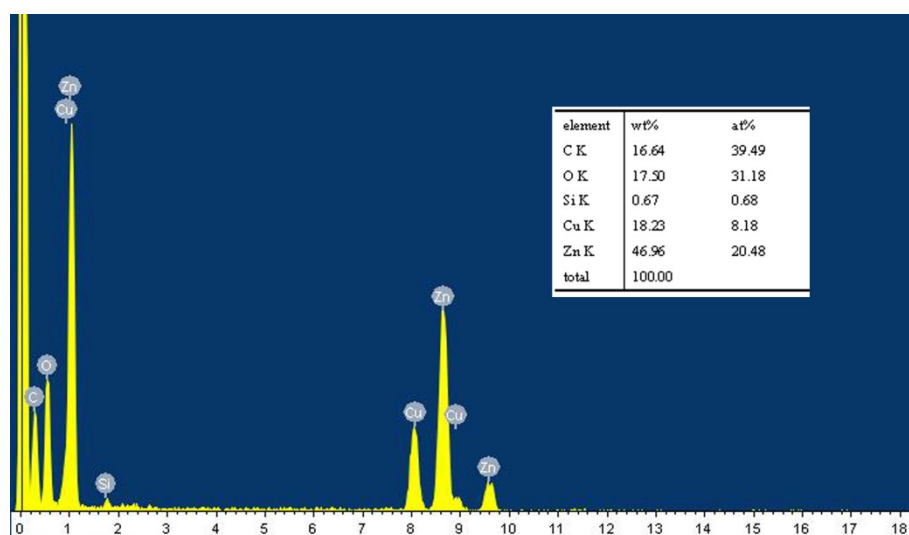

**Figure S2.** The EDS data of ZnO nanorods immersed in APS- $\text{Na}_2\text{SiO}_3$  solution at 90°C for 40 min.

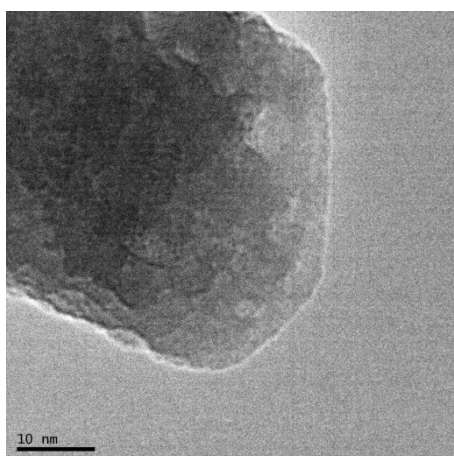

**Figure S3.** Low magnification TEM image of ZnO nanorod immersed in APS- $\text{Na}_2\text{SiO}_3$  solution at 90°C for 80 min
